# Supplementary material
Source: PubMed Central journal article supplement (PMC9489337)

Supplemental Figure 1: Flow chart of cohort identification

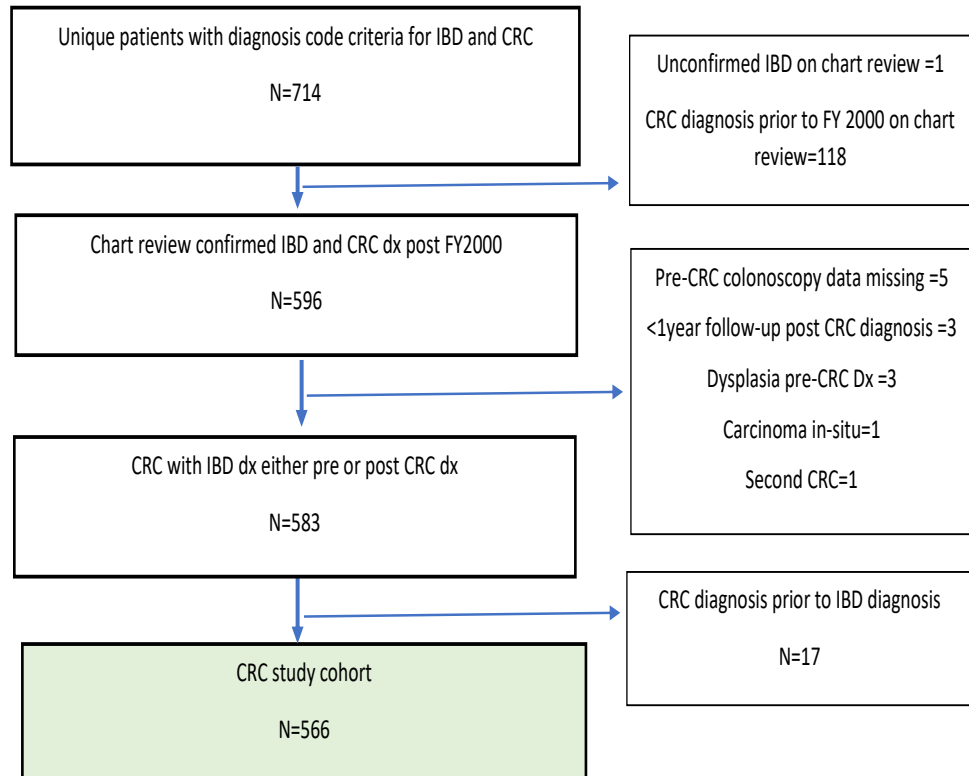

Supplement: NIHMS1802911-supplement-supp_F1.pdf [file NIHMS1802911-supplement-supp_F1.pdf]
